## Congenital heart disease reminiscent of partial trisomy 2p syndrome in mice transgenic for the transcription factor Lbh

Karoline J. Briegel, H. Scott Baldwin, Jonathan A. Epstein and Alexandra L. Joyner *Development* **132**, 3305-3316.

An error in Fig. 7J of the article was not corrected before going to press. Two of the plus signs were mistakenly written as minuses. The correct figure is printed below.

The authors apologise to readers for this mistake.

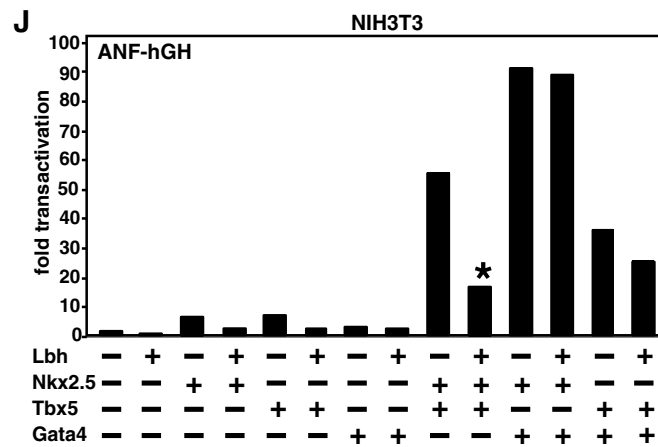

Source: https://cob.silverchair.com/dev/article-pdf/132/17/4015/1468174/4015.pdf
